# Supplementary material for: The study of Priapulus caudatus reveals conserved molecular patterning underlying different gut morphogenesis in the Ecdysozoa
Source: BMC Biol. 2015 Apr 21;13:29. doi: 10.1186/s12915-015-0139-z (PMC4434581; doi:10.1186/s12915-015-0139-z)
Supplement: Additional file 3: Figure S2. — Model for the retraction of the introvert. (A) The introvert-trunk boundary corresponds to the external introvert epidermis, neck, and part of the trunk epidermis, while the animal hemisphere ectoderm corresponds to the mouth and the oral cavity. (B) Before introvert retraction, the mouth moves to an anterior terminal position. (C) The retraction of the introvert starts when the introvert-trunk boundary unfolds, which pushes inwards the mouth and the oral cavity. This process is likely controlled by muscle contraction. (D) At the end of development, the introvert is retracted, the trunk completely covers the embryo, and the neck region lies at the top of the embryo. (E) When the hatching larva protrudes the introvert, the buccal cavity with the scalids and the mouth are projected anteriorly. The pairs of black arrowheads indicate the introvert-trunk boundary. All embryonic stages and the hatching larva are oriented with the anterior to the top. Drawings are not to scale. an, anus; dg, digestive system; mo, mouth; sc, scalids. [file 12915_2015_139_MOESM3_ESM.zip]

Archive with 1 entries (1 files):
- 12915_2015_139_MOESM3_ESM.eps
