# Supplementary material for: The study of Priapulus caudatus reveals conserved molecular patterning underlying different gut morphogenesis in the Ecdysozoa
Source: Springer Nature journal article supplement (doi:10.1186/s12915-015-0139-z), 2015-04-20

**Figure S4**

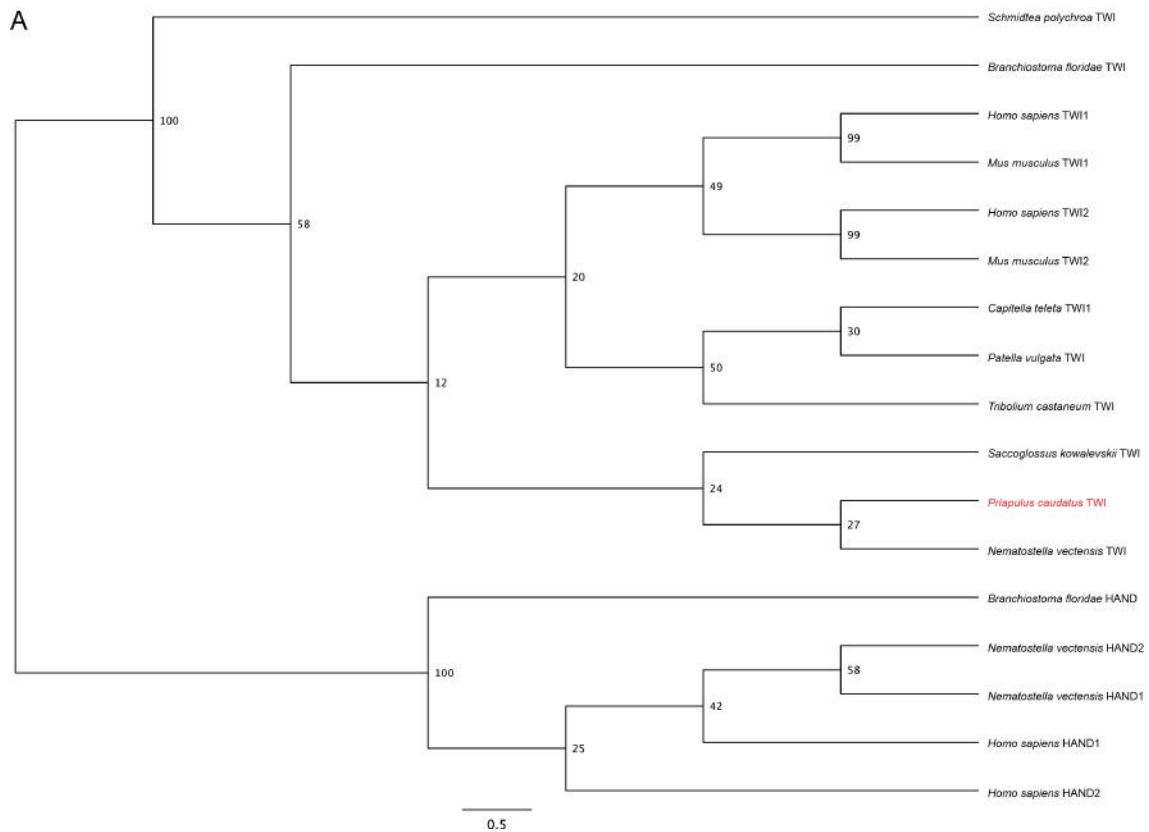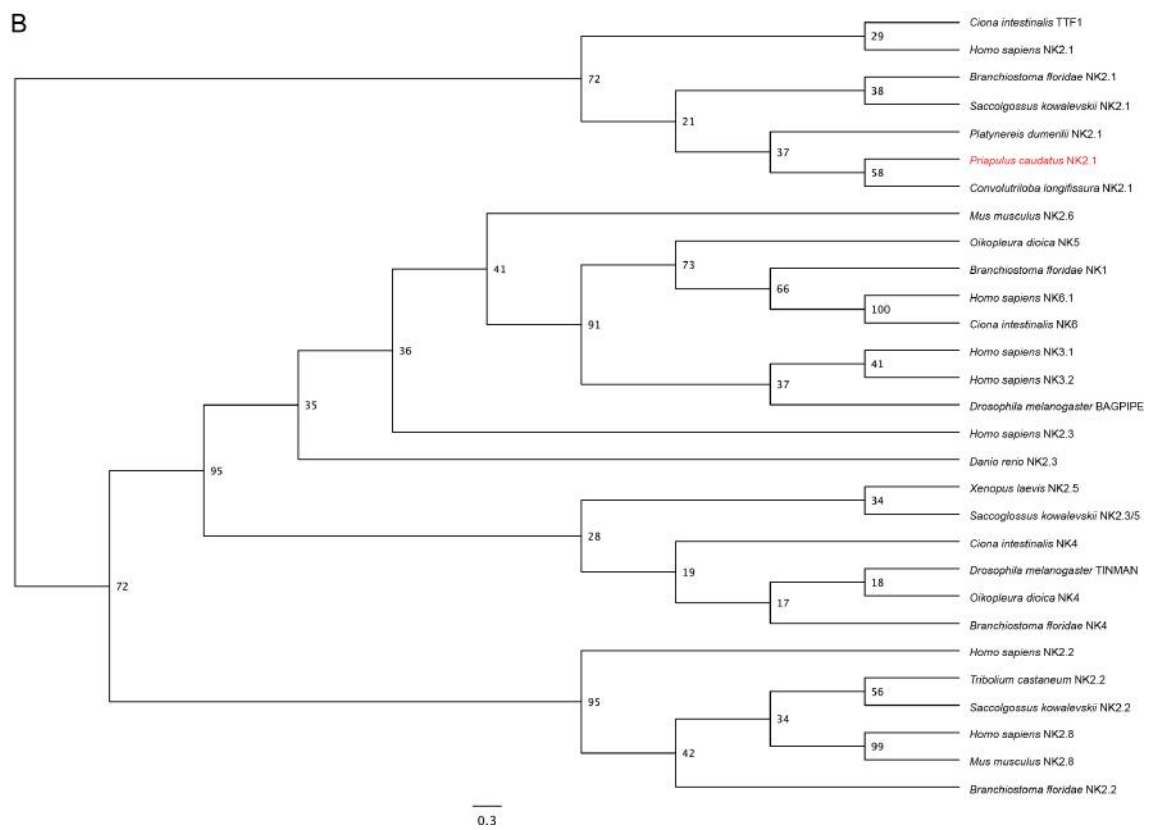

C

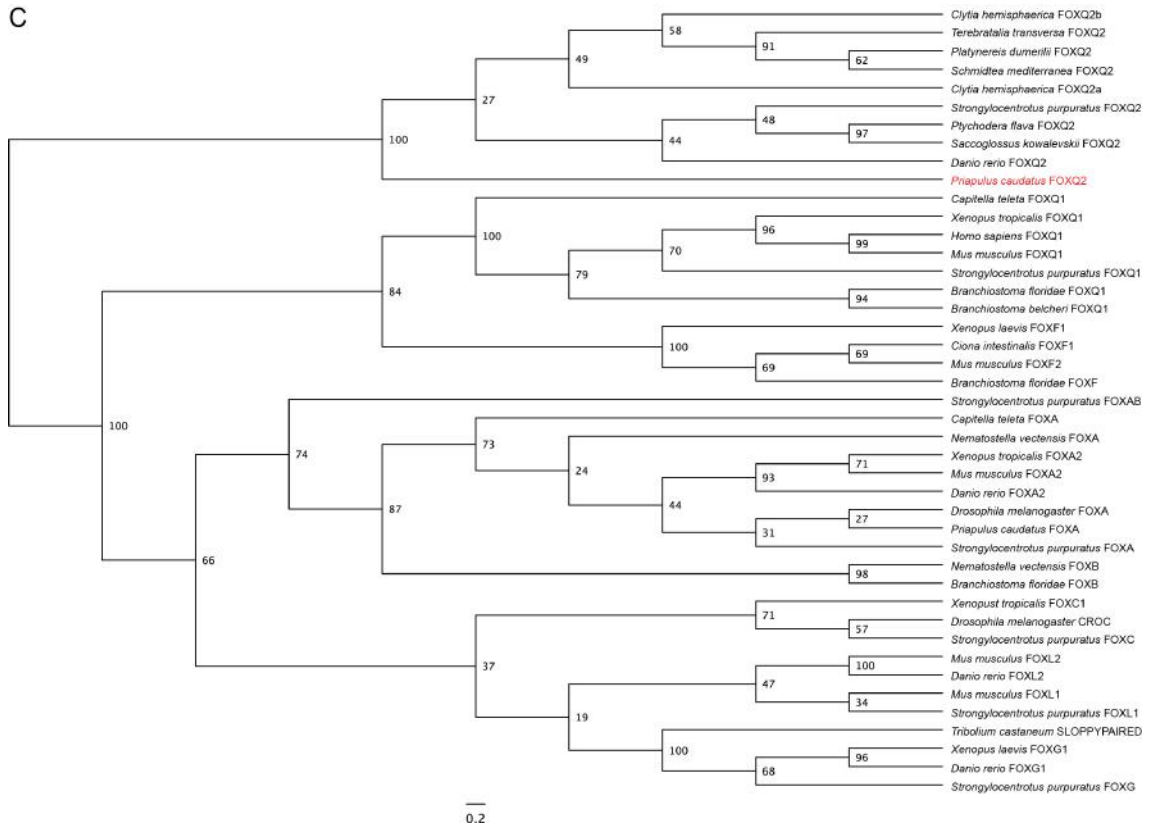

D

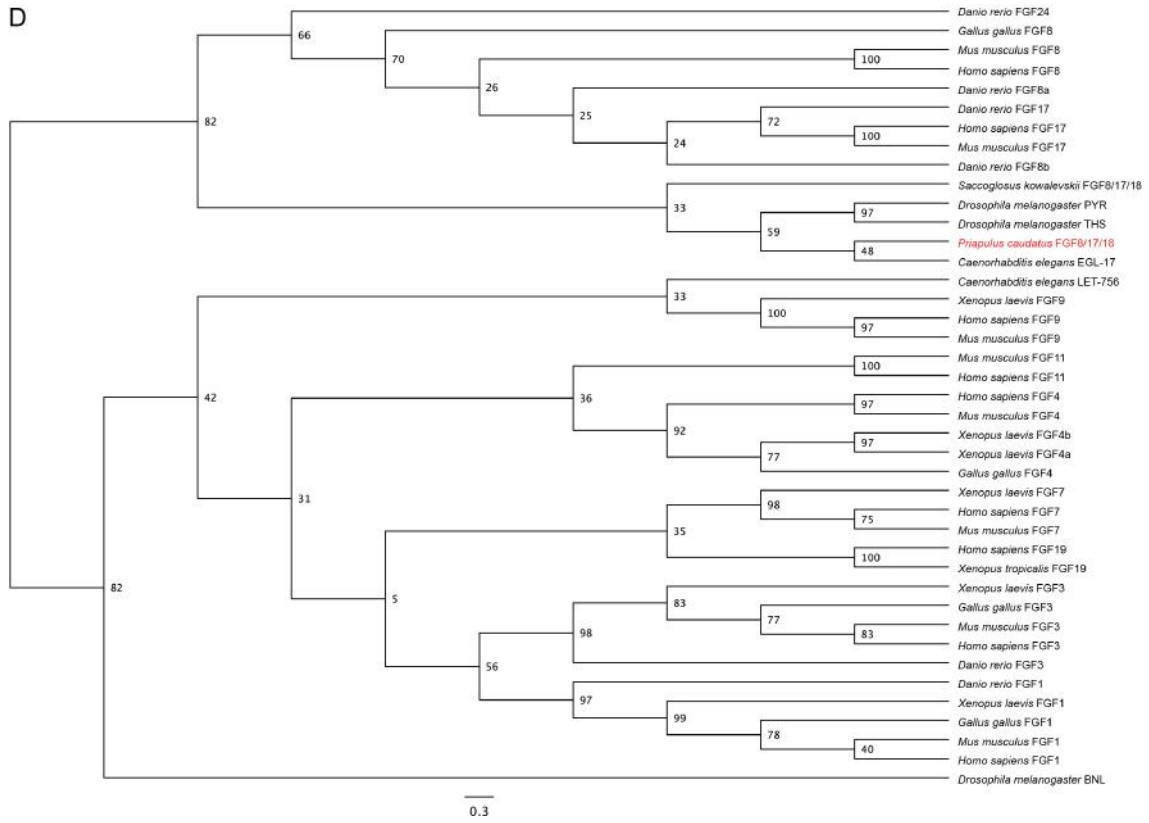

E

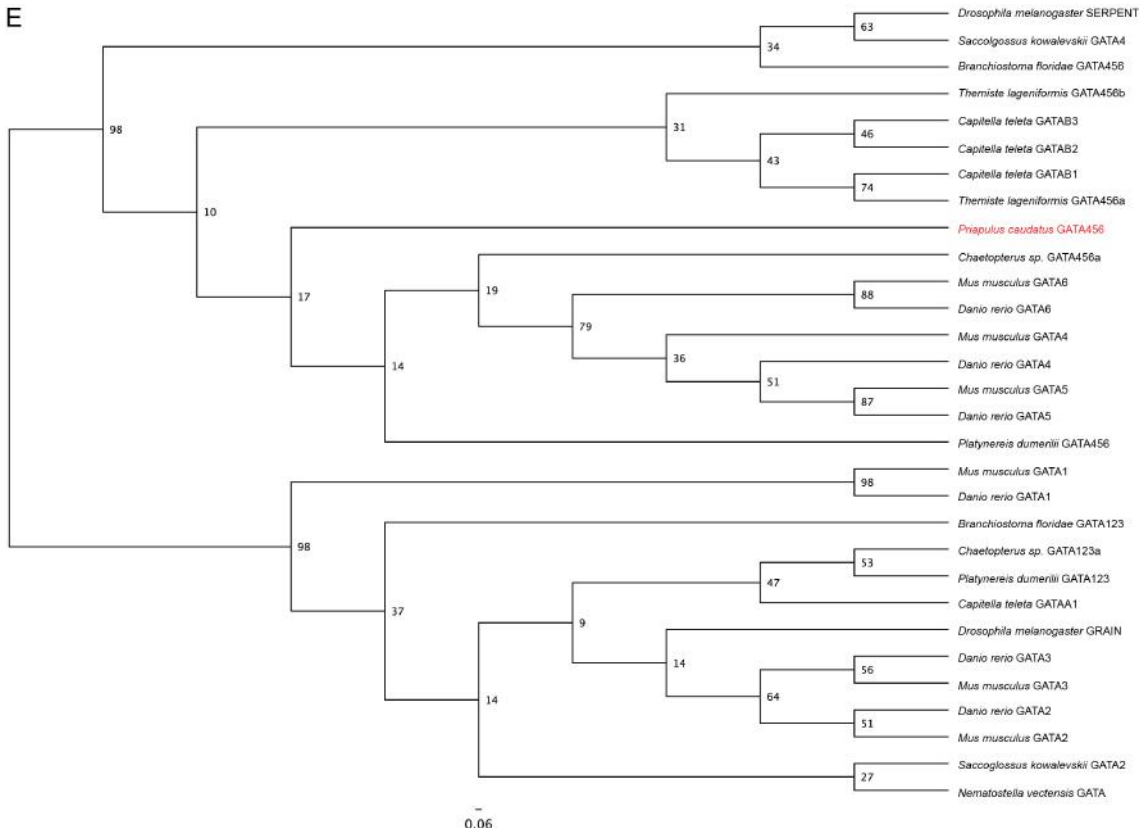

F

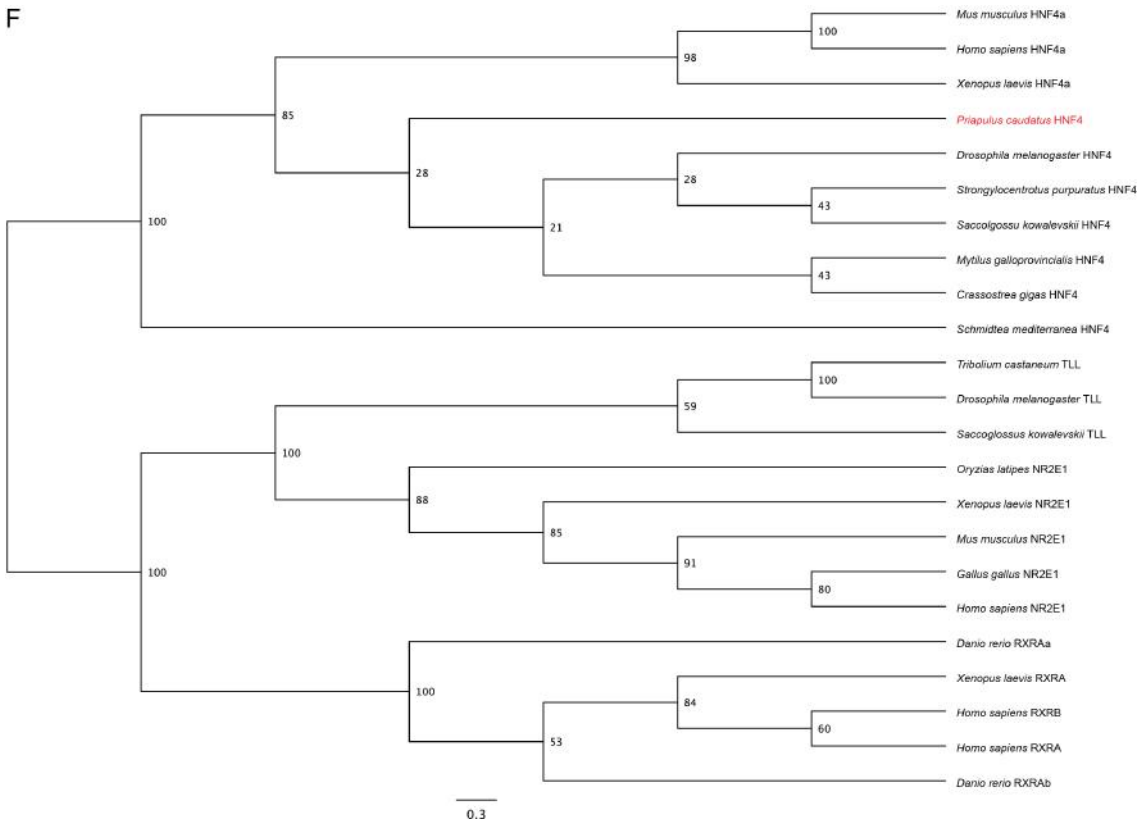

G

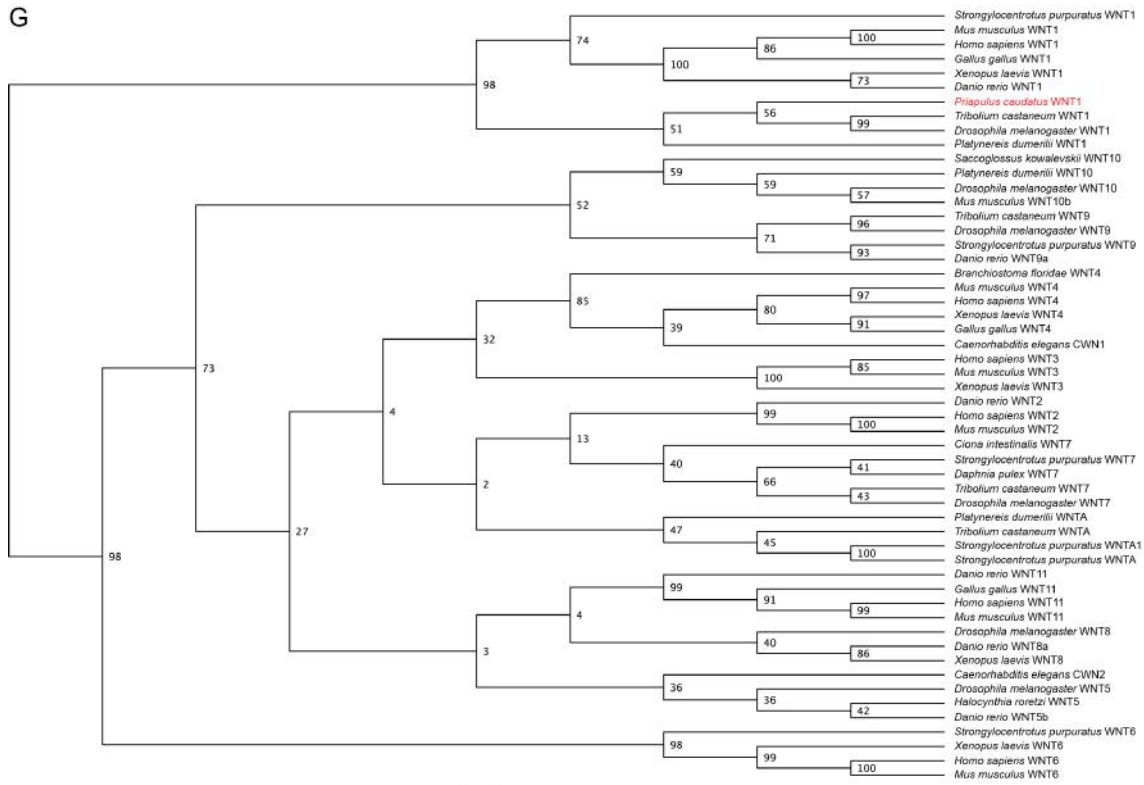

0.3

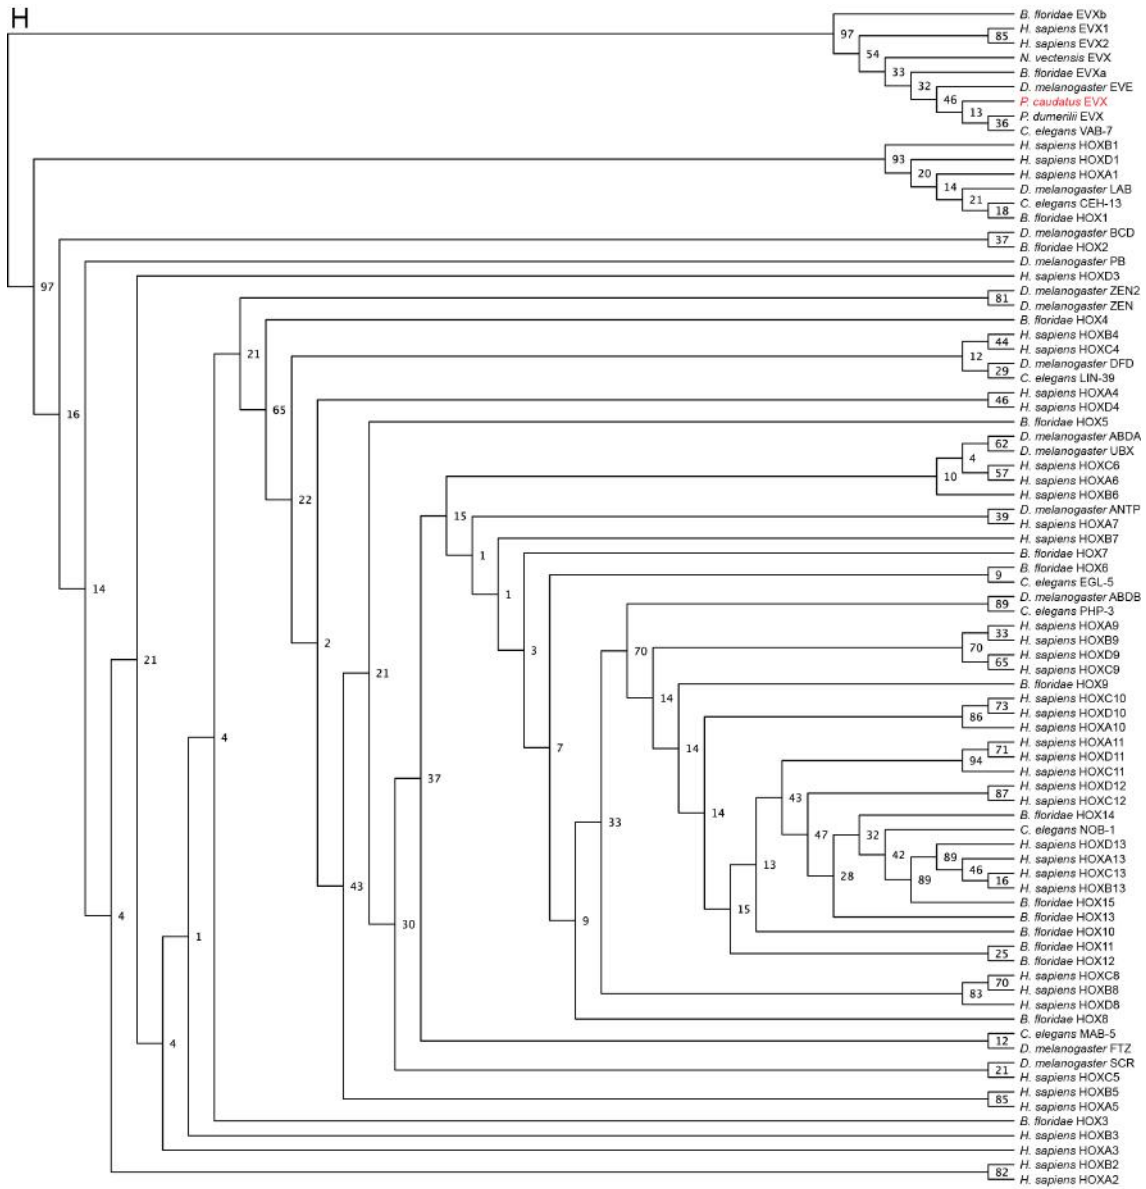

Supplement: MOESM5 [file 12915_2015_139_MOESM5_ESM.pdf]
